# Supplementary material
Source: publisher figshare collection journal article supplement (https://springernature.figshare.com/ndownloader/files/20077979)

## Additional File 4

**Figure A4:** Scatterplots of concordance correlation coefficients between reader 1 and reader 2 at the Time 1 and at Time 2 regarding whole tumor (WTu) apparent diffusion coefficient (ADC) maximum (A,B), WTu ADC mean (C,D), and WTu ADC minimum (E,F).

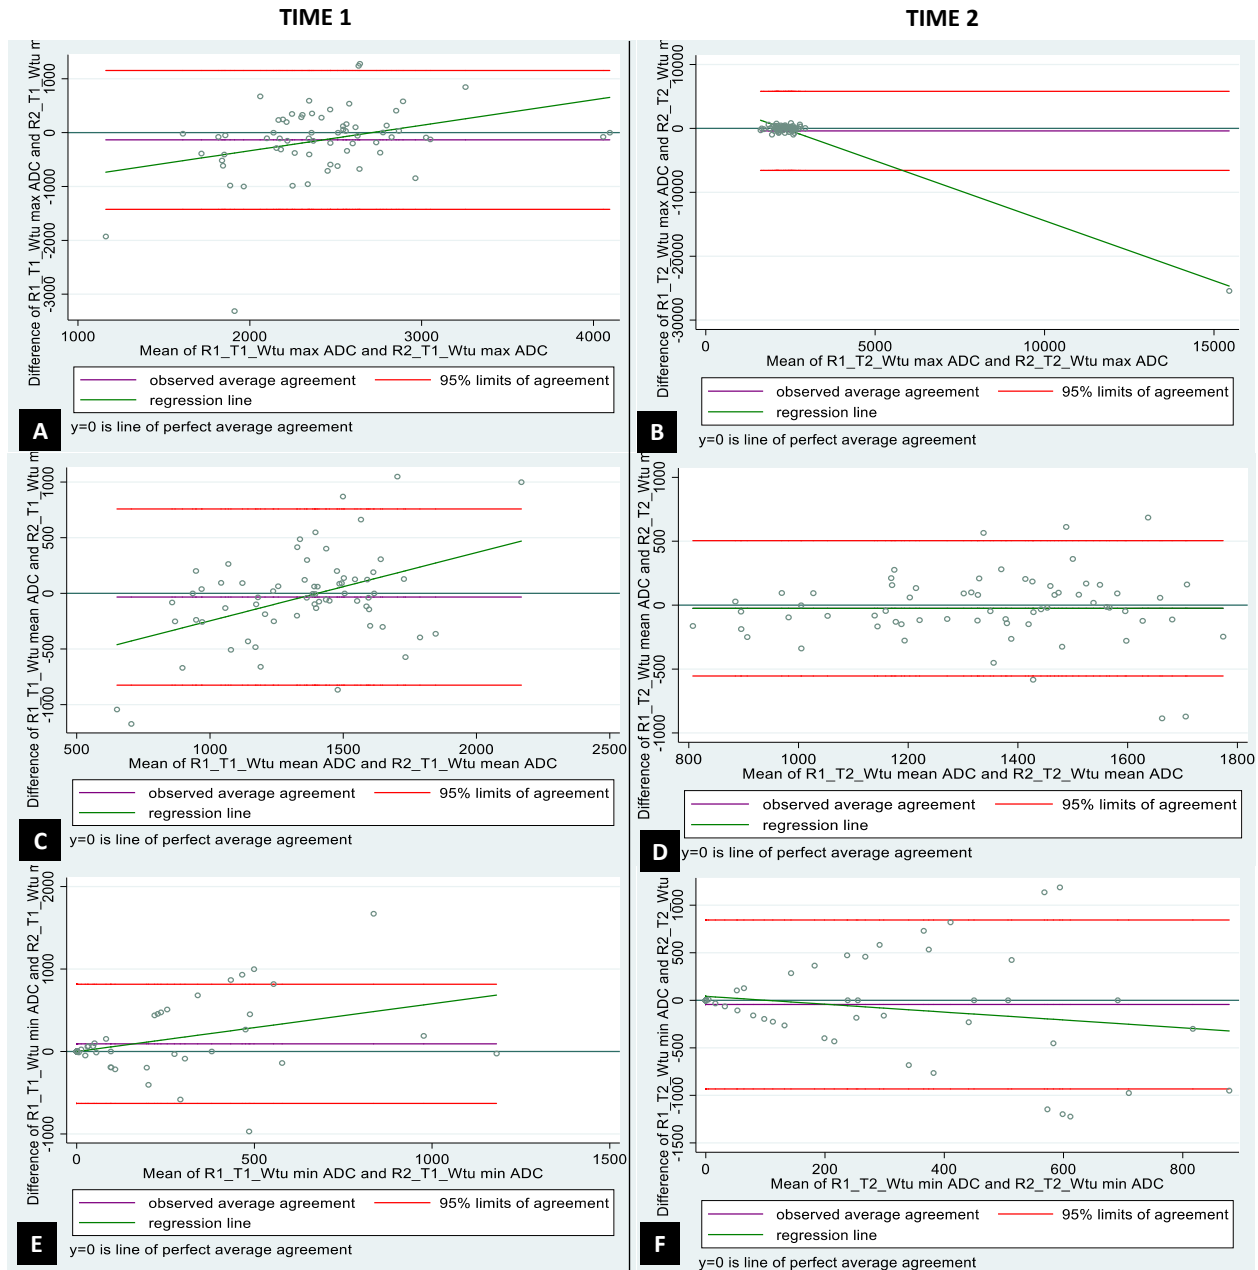

Supplement: Supplementary file [file 20077979]
